# Supplementary material for: Cyclophilin A protects mice against infection by influenza A virus
Source: PubMed Central journal article supplement (PMC4926061; doi:10.1038/srep28978), 2016-06-29
Supplement: srep28978-s1.pdf [file srep28978-s1.pdf]

## **Cyclophilin A protects mice against infection by influenza A virus**

Jing Li<sup>1</sup>, Can Chen<sup>1</sup>, Gary Wong<sup>1</sup>, Wei Dong<sup>3</sup>, Weinan Zheng<sup>1</sup>, Yun Li<sup>1</sup>, Lei Sun<sup>1</sup>, Lianfeng Zhang<sup>3</sup>, George F. Gao<sup>1,2</sup>, Yuhai Bi<sup>1,2\*</sup>, and Wenjun Liu<sup>1,2\*</sup>

1. CAS Key Laboratory of Pathogenic Microbiology and Immunology, Institute of Microbiology, Chinese Academy of Sciences, Beijing 100101, China.

2. Center for Influenza Research and Early-warning (CASCIRE), Chinese Academy of Sciences, Beijing 100101, China.

3. Key Laboratory of Human Disease Comparative Medicine, Ministry of Health, Institute of Laboratory Animal Science, Chinese Academy of Medical Sciences & Comparative Medical Center, Peking Union Medical College, Beijing, 100021 China,

\* Corresponding authors: Yuhai Bi or Wenjun Liu

Email: Beeyh@im.ac.cn; Liuwj@im.ac.cn

Tel (+86) 10 64807497; Fax (+86) 10 64807503

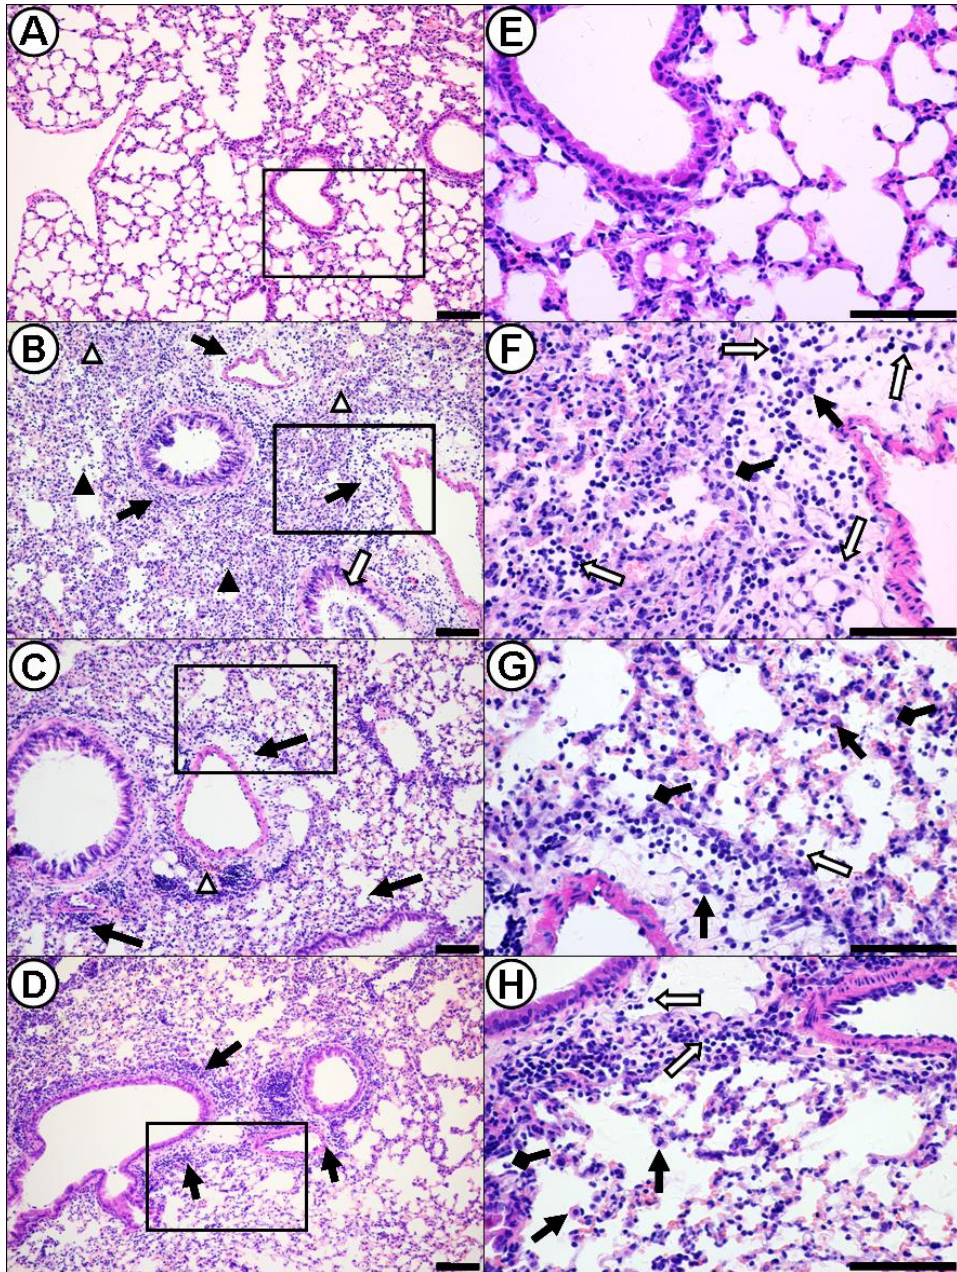

**Figure S1. Hematoxylin and eosin (H&E)-stained lung sections of the infected mice at 7 d.p.i.**

Lung histopathology sections (magnification, 200x) of mice were shown at 7 d.p.i. for the (A) PBS mock-infection control, (B) wild type, (C) CypA-SPC, and (D) CypA-CMV groups. (E to H) Enlargements (600x) for panels A to D, respectively.
